# Supplementary material for: Novel phosphine sulphide gold(i) complexes: topoisomerase I inhibitors and antiproliferative agents
Source: Royal Society of Chemistry journal article supplement (doi:10.1039/d0dt01467b), 2020-01-01
Supplement: d0dt01467b1.pdf [file d0dt01467b1.pdf]

## Supporting Information

### Novel Phosphine Sulphide Gold(I) Complexes: Topoisomerase I Inhibitors and Antiproliferative Agents.

Endika Martín-Encinas,<sup>a,d</sup> Verónica Conejo-Rodríguez,<sup>b,d</sup> Jesús A. Miguel,<sup>b</sup> Jesús M. Martínez-Ilarduya,<sup>b</sup> Gloria Rubiales,<sup>a</sup> Birgitta R. Knudsen,<sup>c</sup> Francisco Palacios<sup>a</sup> and Concepción Alonso<sup>a,\*</sup>

<sup>a</sup> Department of Organic Chemistry I, Faculty of Pharmacy,  
University of Basque Country (UPV/EHU), 01006 Vitoria-Gasteiz, Spain

<sup>b</sup> IU CINQUIMA/Química Inorgánica, Faculty of Science  
University of Valladolid, 47071 Valladolid, Spain

<sup>c</sup> Department of Molecular Biology and Genetics and Interdisciplinary Nanoscience Center (iNANO)  
University of Aarhus, 8000 Aarhus, Denmark

<sup>d</sup> These authors contributed equally

| Page   | Figures, NMR spectra and Tables                                                                                                                                                                                                                                                                                                                                                                                                                                                                                                                                                                                                                                                                                                                                                                                  |
|--------|------------------------------------------------------------------------------------------------------------------------------------------------------------------------------------------------------------------------------------------------------------------------------------------------------------------------------------------------------------------------------------------------------------------------------------------------------------------------------------------------------------------------------------------------------------------------------------------------------------------------------------------------------------------------------------------------------------------------------------------------------------------------------------------------------------------|
| S2     | <b>Table S1.</b> TopI inhibitory activity of compounds <b>1-8</b> and CPT                                                                                                                                                                                                                                                                                                                                                                                                                                                                                                                                                                                                                                                                                                                                        |
| S3     | <b>Table S2.</b> Calculated energies and molecular properties computed at B3LYP/6-311G** basis set level of theory for compounds <b>3, 4, 7</b> and <b>8</b> , CPT and auranofin.                                                                                                                                                                                                                                                                                                                                                                                                                                                                                                                                                                                                                                |
| S4     | <b>Figure S1.</b> MEP surfaces mapped from total electron density for compounds <b>3</b> and <b>4</b> . Electrostatic potentials are displayed on a 0.002 a.u. isodensity surface. The limits of electrostatic potentials for each molecule are under surfaces. Potential increases in the following order: red (most negative)/orange/yellow/green/blue (most positive).<br><b>Figure S2.</b> MEP surfaces mapped from total electron density for Auranofin and compounds having the Au-perfluorophenyl ligand <b>7</b> and <b>8</b> . Electrostatic potentials are displayed on a 0.002 a.u. isodensity surface. The limits of electrostatic potentials for each molecule are under surfaces. Potential increases in the following order: red (most negative)/orange/yellow/green/blue (most positive).        |
| S5-S15 | NMR spectra of the gold(I) complexes [Au(C <sub>6</sub> F <sub>5</sub> )(SPPH <sub>2</sub> R)]                                                                                                                                                                                                                                                                                                                                                                                                                                                                                                                                                                                                                                                                                                                   |
| S16    | <b>Table S3.</b> Crystal data and structure refinements for complexes <b>5, 6</b> and <b>8</b>                                                                                                                                                                                                                                                                                                                                                                                                                                                                                                                                                                                                                                                                                                                   |
| S17    | <b>Figure S3.</b> Partial view of crystal packing of <b>5</b> . Centroids of C <sub>6</sub> F <sub>5</sub> rings are shown as red circles and Centroid...centroid distance is 3.754 Å. Color code: C, dark gray; P, orange; Au, S, yellow; F, green and H, gray.<br><b>Figure S4.</b> Partial view of crystal packing of <b>6</b> . Centroids of C <sub>6</sub> F <sub>5</sub> rings are shown as red circles and centroid...centroid distance is 3.554 Å. Color code: C, dark gray; P, orange; Au, S, yellow; F, green; N blue and H, gray.<br><b>Figure S5.</b> Partial view of crystal packing of <b>8</b> . Centroids of C <sub>6</sub> F <sub>5</sub> rings are shown as red circles and centroid...centroid distance is 3.790 Å. Color code: C, dark gray; P, orange; Au, S, yellow; F, green and H, gray. |

**Table S1.** TopI inhibitory activity of compounds **1-8** and CPT.<sup>[a]</sup>

| Entry | Cmpd      | R <sup>1</sup>                                  | R <sup>2</sup> | % inhibition |     |     |
|-------|-----------|-------------------------------------------------|----------------|--------------|-----|-----|
|       |           |                                                 |                | 15''         | 1'  | 3'  |
| 1     |           | CPT                                             |                | ++           | ++  | ⊖   |
| 2     | <b>1</b>  | -                                               | -              | ⊖            | ⊖   | ⊖   |
| 3     | <b>2</b>  | -                                               | -              | ⊖            | ⊖   | ⊖   |
| 4     | <b>3a</b> | 2-naphthyl                                      | H              | +++          | +++ | +++ |
| 5     | <b>3b</b> | 4-CF <sub>3</sub> C <sub>6</sub> H <sub>4</sub> | F              | +++          | +++ | +++ |
| 6     | <b>4</b>  | 2-naphthyl                                      | H              | ⊖            | ⊖   | ⊖   |
| 7     | <b>5</b>  | -                                               | -              | ⊖            | ⊖   | ⊖   |
| 8     | <b>6</b>  | -                                               | -              | ⊖            | ⊖   | ⊖   |
| 9     | <b>7a</b> | 2-naphthyl                                      | H              | +++          | +++ | +++ |
| 10    | <b>7b</b> | 4-CF <sub>3</sub> C <sub>6</sub> H <sub>4</sub> | F              | +++          | +++ | +++ |
| 11    | <b>8</b>  | 2-naphthyl                                      | H              | +++          | +++ | +++ |

<sup>a</sup>The activity of the compounds to inhibit TopI relaxation was expressed semiquantitatively as follows: ⊖, no activity; ++ similar activity to camptothecin; +++ strong activity.

**Table S2.** Calculated energies and molecular properties computed at B3LYP/6-311G\*\* basis set level of theory for compounds **3**, **4**, **7** and **8**, CPT and auranofin.<sup>a</sup>

| Entry | Cmpd.            | $\Delta G$ (g)<br>(in a.u.) | $\Delta G$ (aq)<br>(in a.u.) | $E_{\text{HOMO}}$ (eV) | $E_{\text{LUMO}}$ (eV) | Gap<br>(-eV) | $\eta$<br>(in a.u.) | $\mu$<br>(in a.u.) | $\omega$<br>(eV) | $\Delta N_{\text{max}}$<br>(in a.u.) | Dipole<br>moment<br>(debye) | Polarizability<br>(in a.u.) |
|-------|------------------|-----------------------------|------------------------------|------------------------|------------------------|--------------|---------------------|--------------------|------------------|--------------------------------------|-----------------------------|-----------------------------|
| 1     | <b>3a</b>        | -2222.26                    | -2222.28                     | -0.20443               | -0.04402               | 4.37         | 0.16041             | -0.12422           | 0.048101         | 0.77442                              | 4.129                       | 459.406                     |
| 2     | <b>3b</b>        | -2505.04                    | -2505.06                     | -0.21266               | -0.04843               | 4.47         | 0.16423             | -0.13055           | 0.051885         | 0.79489                              | 5.067                       | 420.088                     |
| 3     | <b>4</b>         | -2219.89                    | -2219.91                     | -0.20865               | -0.07914               | 3.52         | 0.12951             | -0.14389           | 0.079939         | 1.11107                              | 5.632                       | 485.264                     |
| 4     | <b>7a</b>        | -3085.73                    | -3085.75                     | -0.22185               | -0.06145               | 4.36         | 0.16040             | -0.14165           | 0.062546         | 0.88310                              | 12.227                      | 570.122                     |
| 5     | <b>7b</b>        | -3368.51                    | -3368.53                     | -0.23032               | -0.06665               | 4.45         | 0.16367             | -0.14848           | 0.067354         | 0.90722                              | 12.173                      | 527.748                     |
| 6     | <b>8</b>         | -3083.37                    | -3083.39                     | -0.22258               | -0.09552               | 3.46         | 0.12706             | -0.15905           | 0.099547         | 1.25177                              | 14.478                      | 594.428                     |
| 7     | <b>CPT</b>       | -1182.22                    | -1182.24                     | -0.22711               | -0.0929                | 3.65         | 0.13426             | -0.15998           | 0.095314         | 1.191569                             | 6.419                       | 265.418                     |
| 8     | <b>auranofin</b> | -2334.77                    | -2334.80                     | -0.20249               | -0.01960               | 4.98         | 0.18289             | -0.11104           | 0.033711         | 0.60717                              | 8.0317                      | 328.53                      |

<sup>[a]</sup> Abbreviations:  $\Delta G$  (g): Free energy in gas phase[A];  $\Delta G$  (aq): Free energy in aqueous medium[B]; Gap:  $E_{\text{HOMO}}-E_{\text{LUMO}}$ ;  $\eta$ : Hardnesses[C];  $\mu$ : Chemical Potentials[C];  $\omega$ : Global Electrophilicities[C] and  $\Delta N_{\text{max}}$ : Maximum Number of Accepted Electrons[C].

[A] Computed a B3LYP(PCM)/6-311G\*\* + $\Delta ZPVE$  level; [B] Computed a B3LYP(PCM)/6-311G\*\* + $\Delta ZPVE$  level using water as solvent; [C] Computed at the B3LYP/6-311G\*\* level of theory according to the approach and equations described previously.<sup>1</sup>

Reference:

<sup>1</sup> B. Lecea, M. Ayerbe, A. Arrieta, F. P. Cossio, V. Branchadell, R. M. Ortuño and A. Baceiredo, *J. Org. Chem.*, 2007, **72**, 357–366.

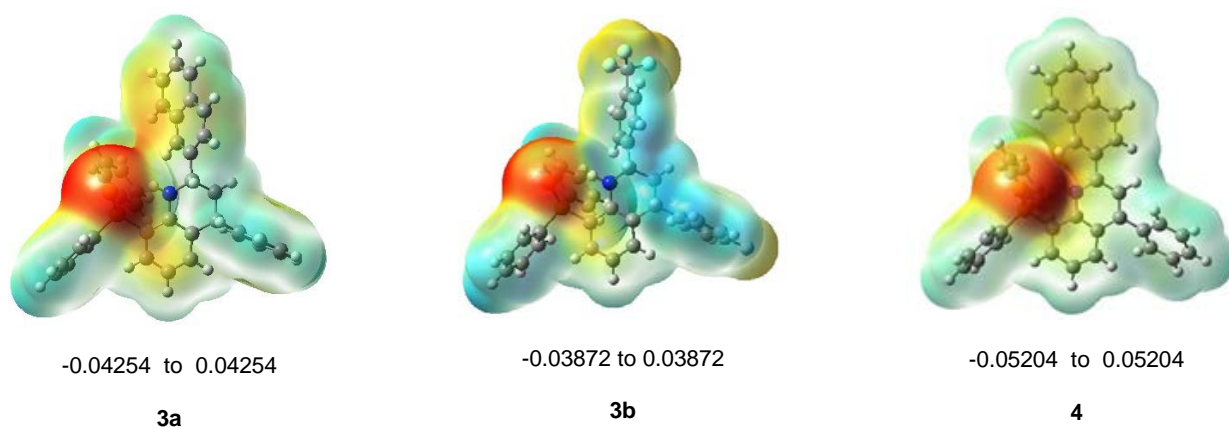

**Figure S1.** MEP surfaces mapped from total electron density for compounds **3** and **4**. Electrostatic potentials are displayed on a 0.002 a.u. isodensity surface. The limits of electrostatic potentials for each molecule are under surfaces. Potential increases in the following order: red (most negative)/orange/yellow/green/blue (most positive).

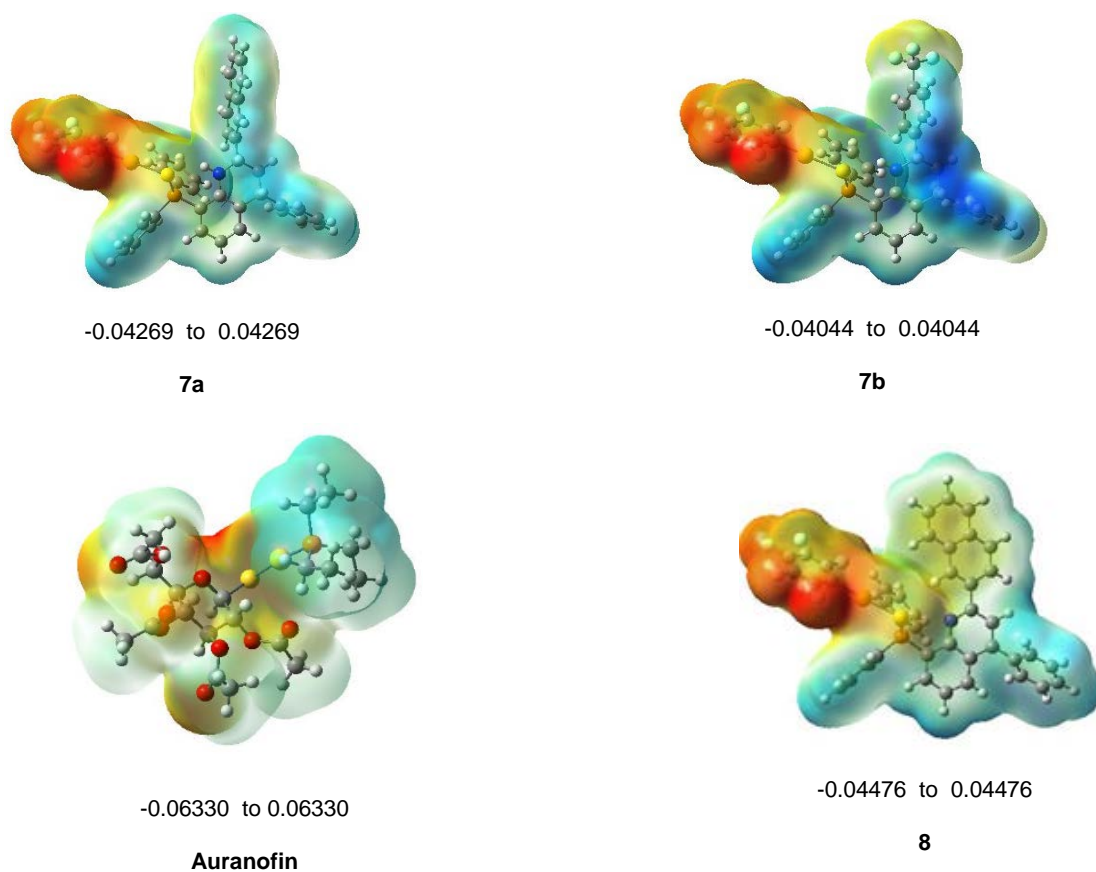

**Figure S2.** MEP surfaces mapped from total electron density for auranofin and compounds having the Au-perfluorophenyl ligand **7** and **8**. Electrostatic potentials are displayed on a 0.002 a.u. isodensity surface. The limits of electrostatic potentials for each molecule are under surfaces. Potential increases in the following order: red (most negative)/orange/yellow/green/blue (most positive).

NMR spectra of the gold(I) complexes  $[\text{Au}(\text{C}_6\text{F}_5)(\text{SPPH}_2\text{R})]$

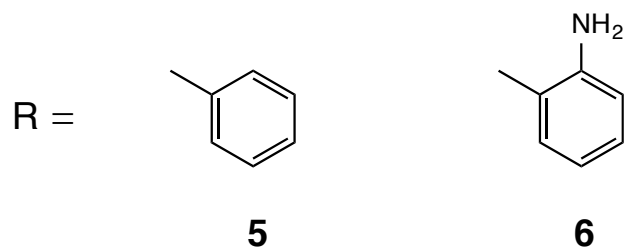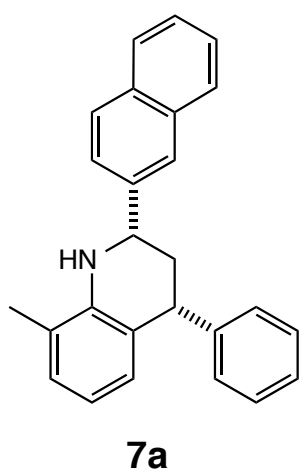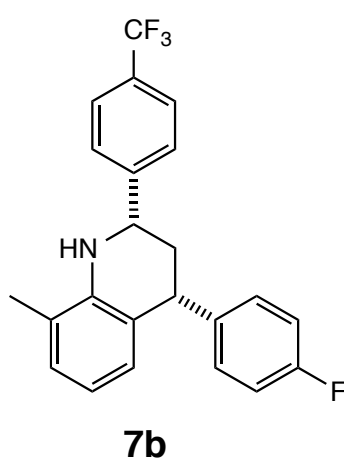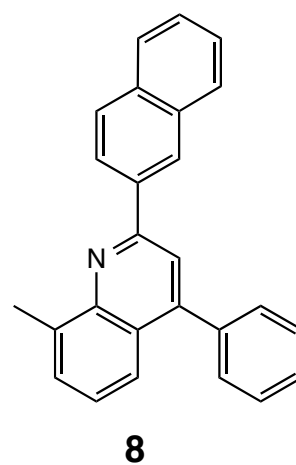

## Complex 5

$^1\text{H}$  NMR (499.70 MHz,  $\text{CD}_2\text{Cl}_2$ , 298 K)

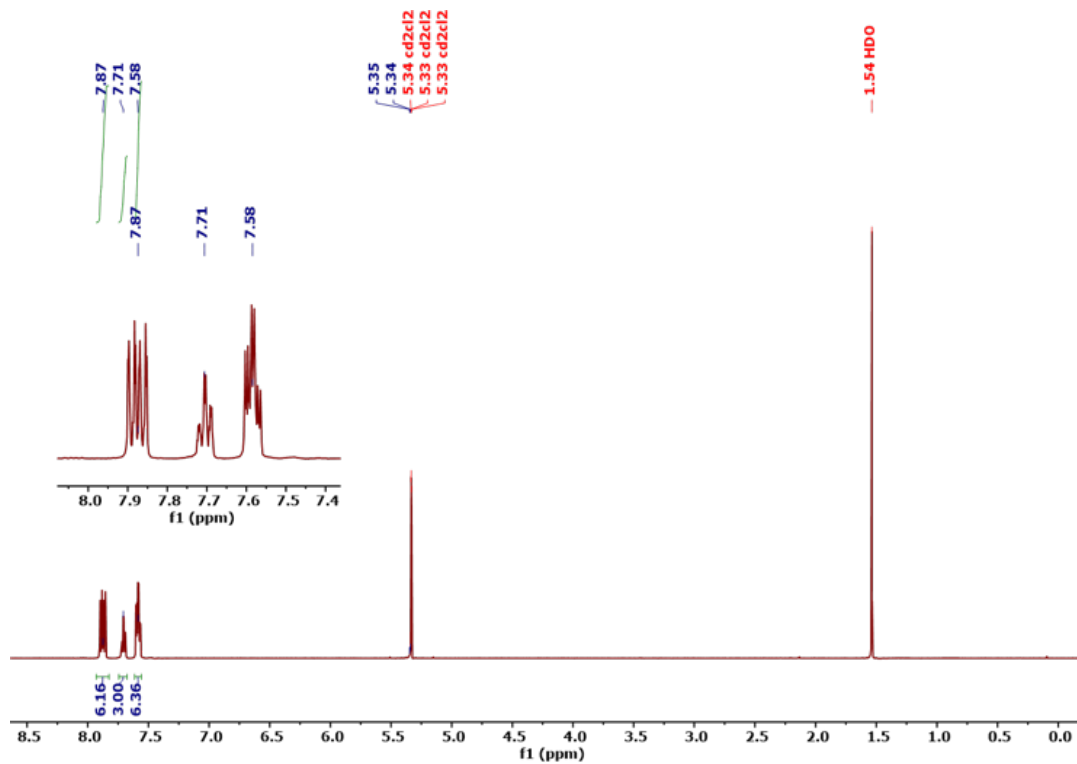

$^{19}\text{F}$  NMR (470.17 MHz,  $\text{CD}_2\text{Cl}_2$ , 298 K)

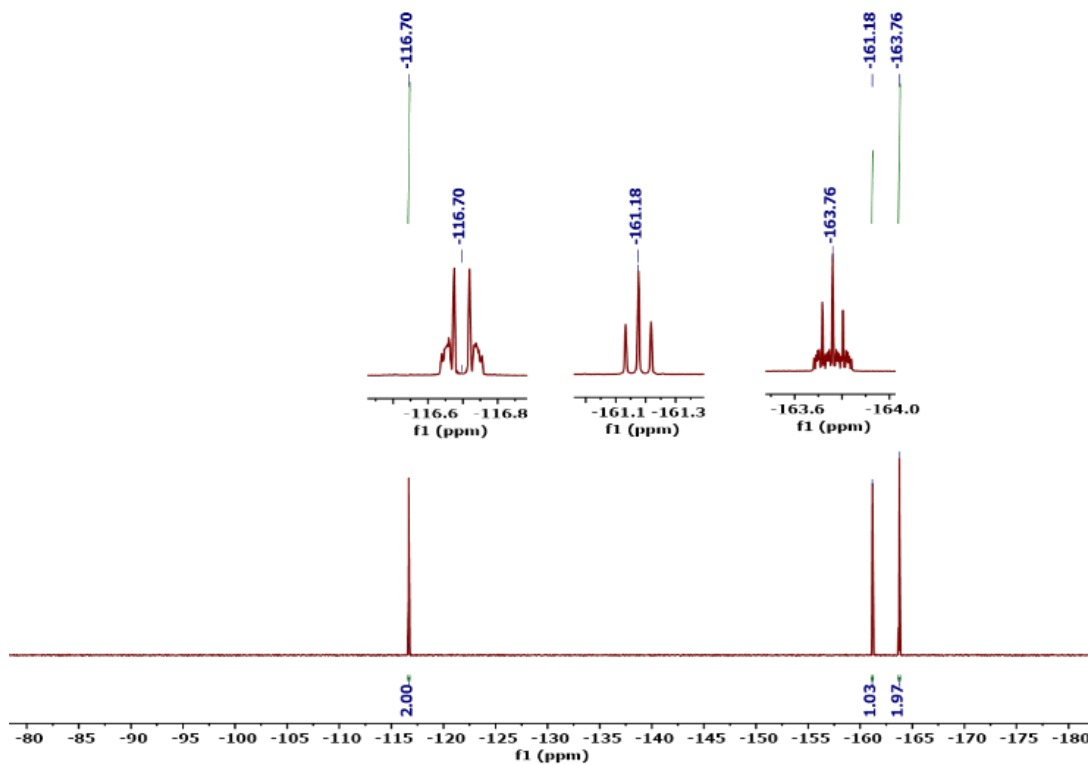

$^{31}\text{P}\{^1\text{H}\}$  NMR (202.31 MHz,  $\text{CD}_2\text{Cl}_2$ , 298 K)

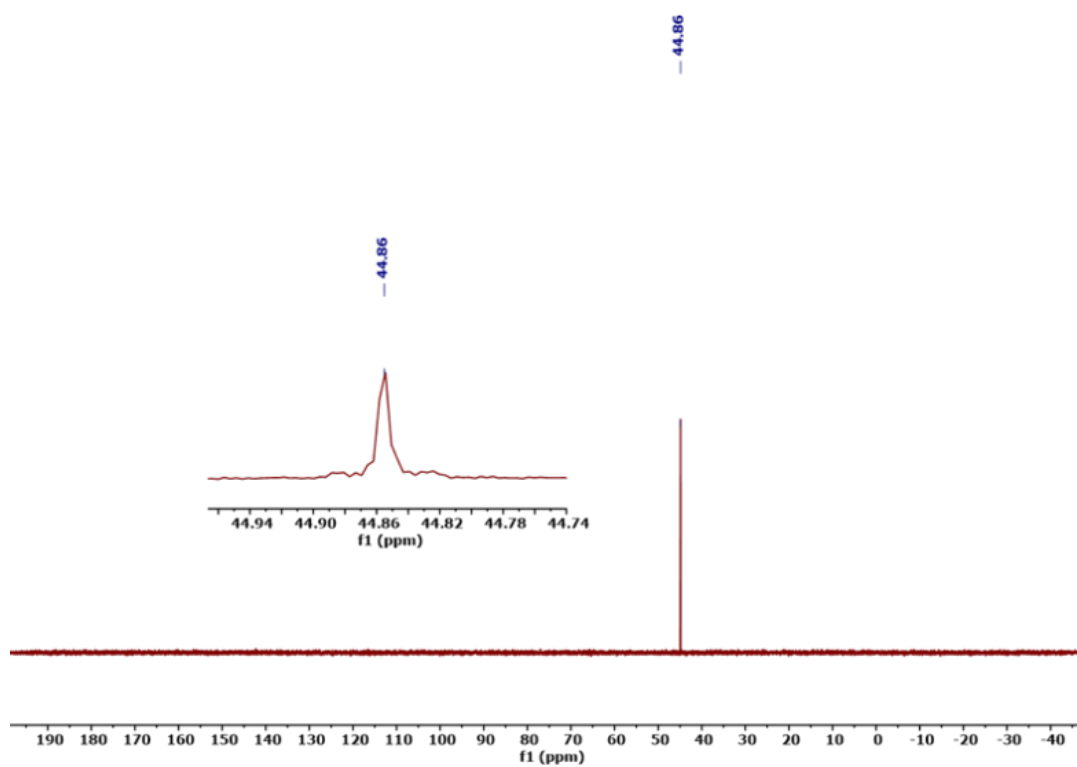

## Complex 6

$^1\text{H}$  NMR (499.70 MHz,  $\text{CD}_2\text{Cl}_2$ , 298 K)

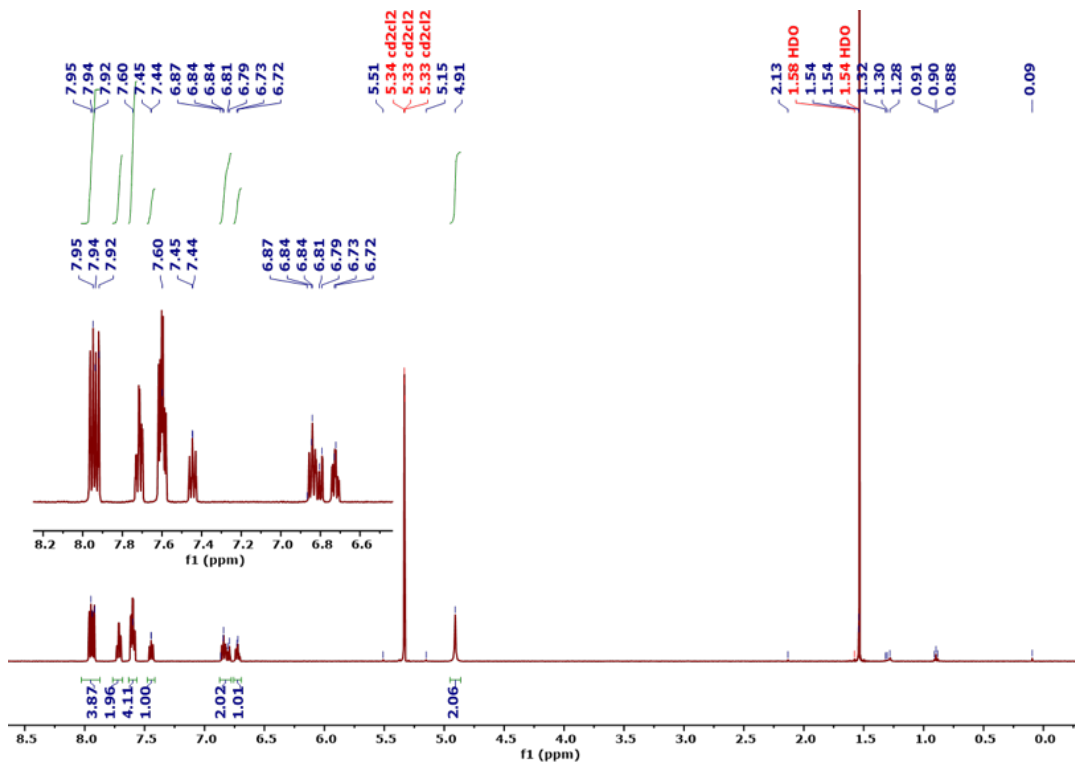

$^{19}\text{F}$  NMR (470.17 MHz,  $\text{CD}_2\text{Cl}_2$ , 298 K)

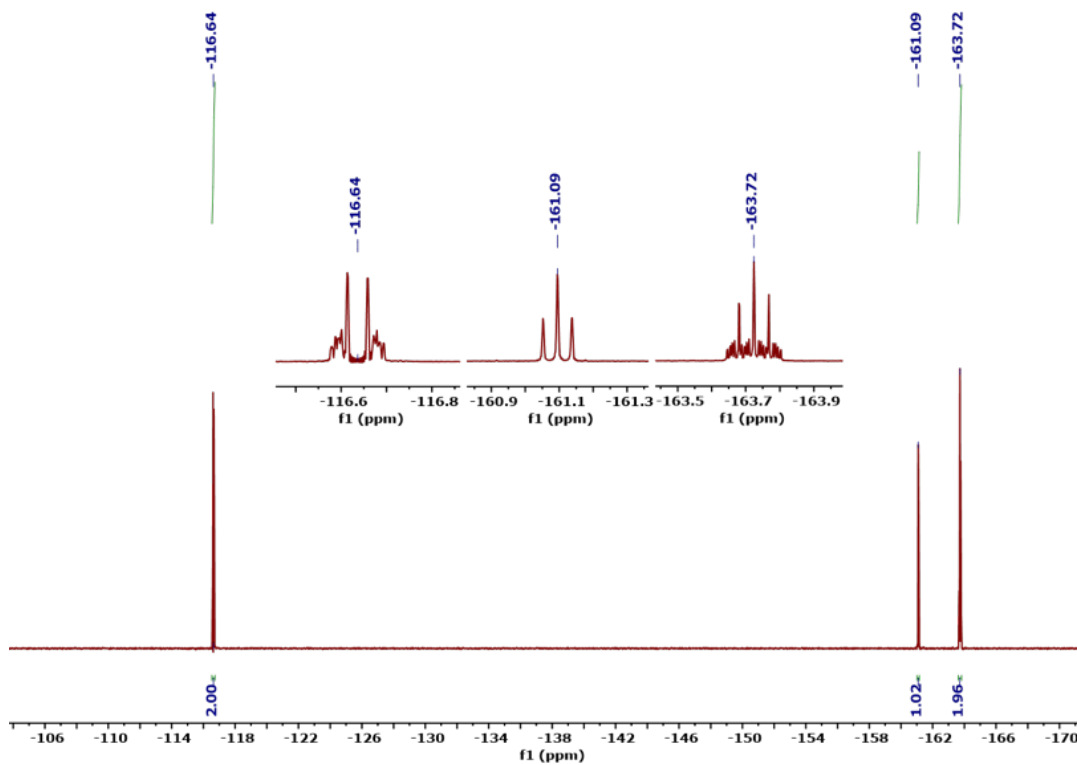



$^{31}\text{P}\{^1\text{H}\}$  NMR (202.31 MHz,  $\text{CD}_2\text{Cl}_2$ , 298 K)

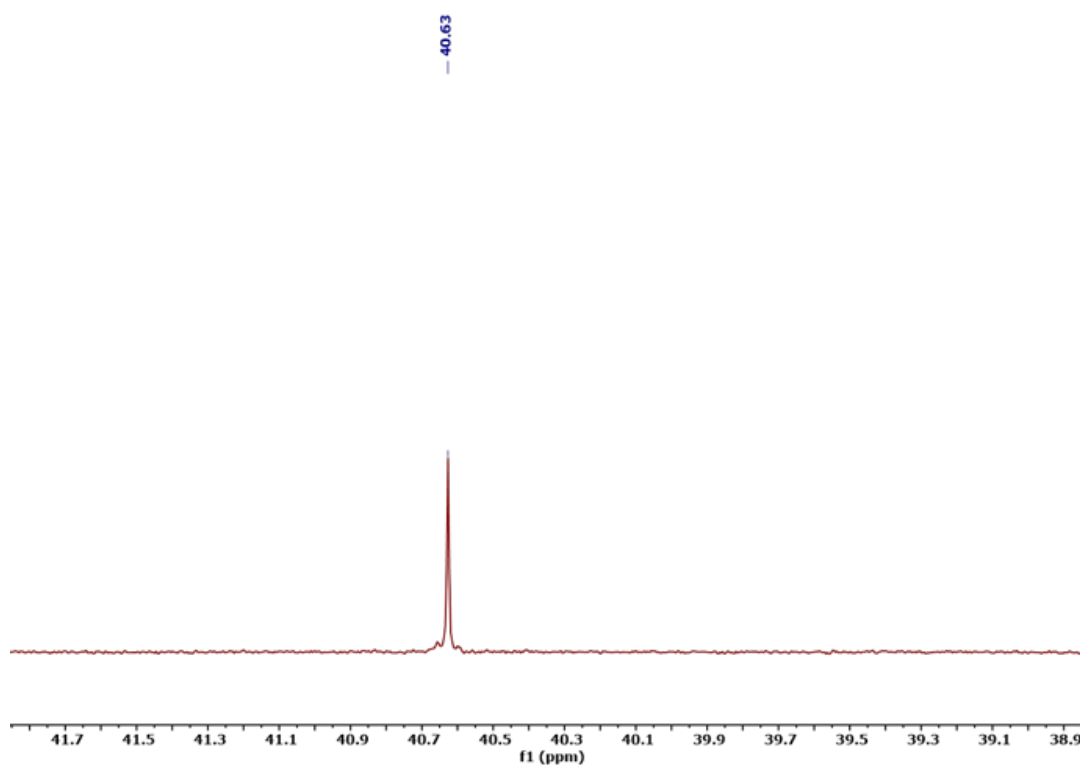

## Complex 7a

$^1\text{H}$  NMR (499.70 MHz,  $\text{CD}_2\text{Cl}_2$ , 298 K)

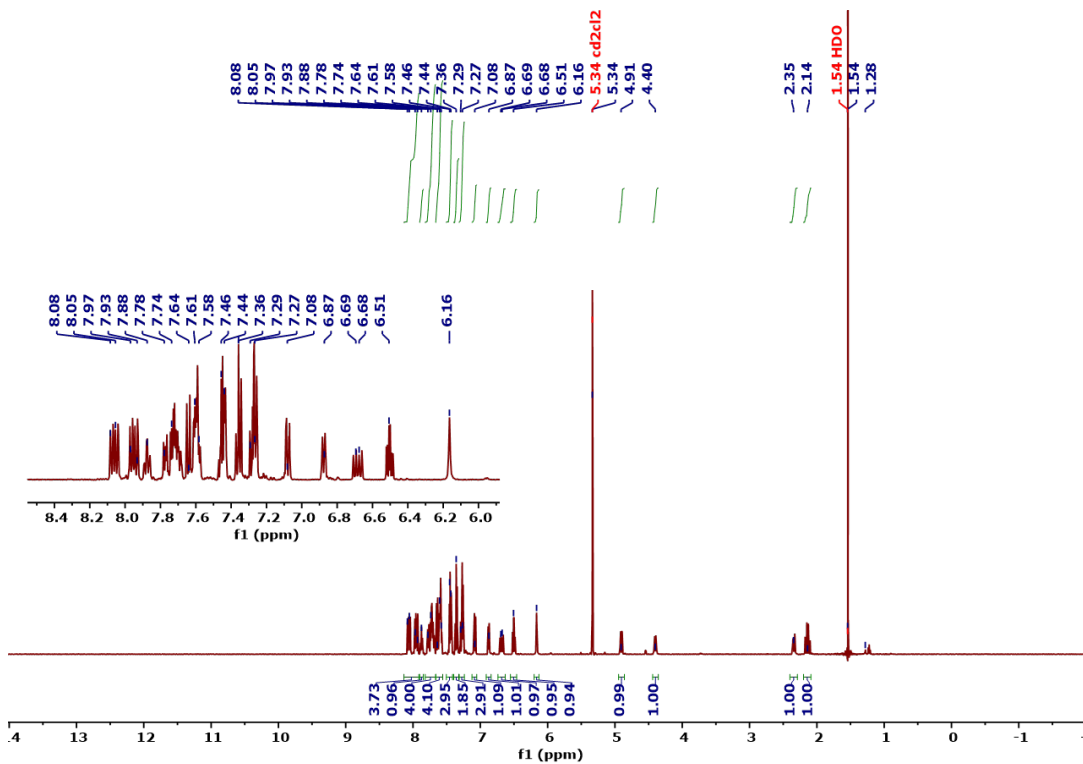

$^{19}\text{F}$  NMR (470.17 MHz,  $\text{CD}_2\text{Cl}_2$ , 298 K)

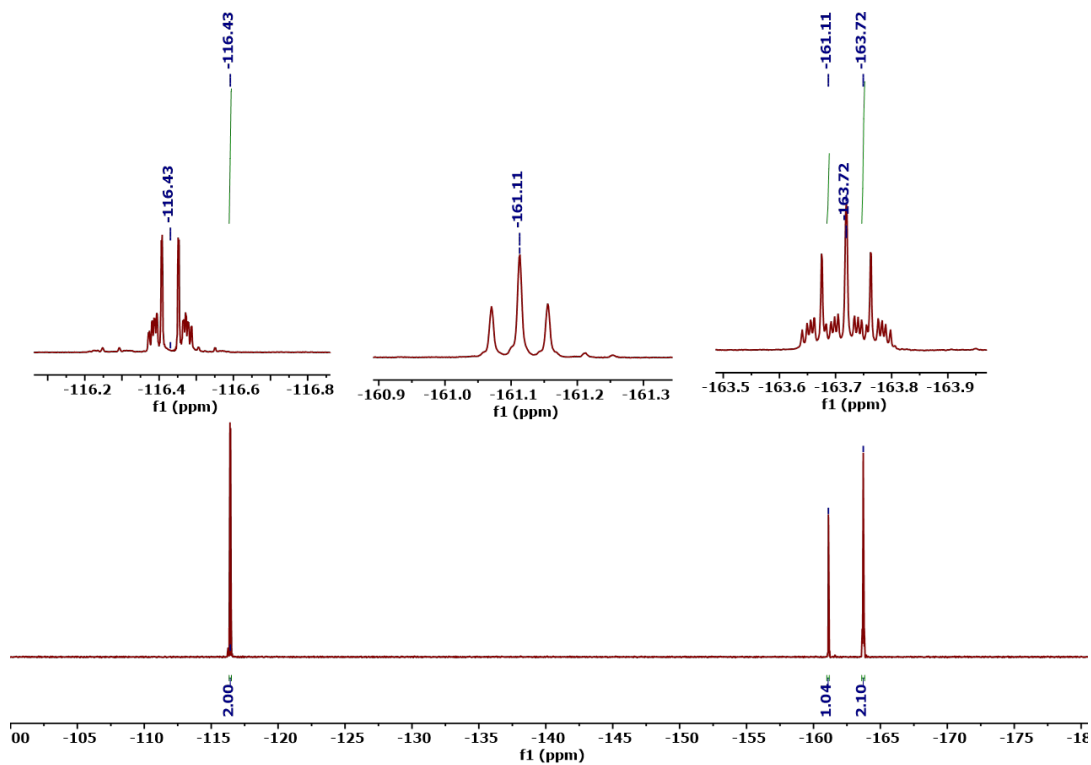

$^{31}\text{P}\{^1\text{H}\}$  NMR (202.31 MHz,  $\text{CD}_2\text{Cl}_2$ , 298 K)

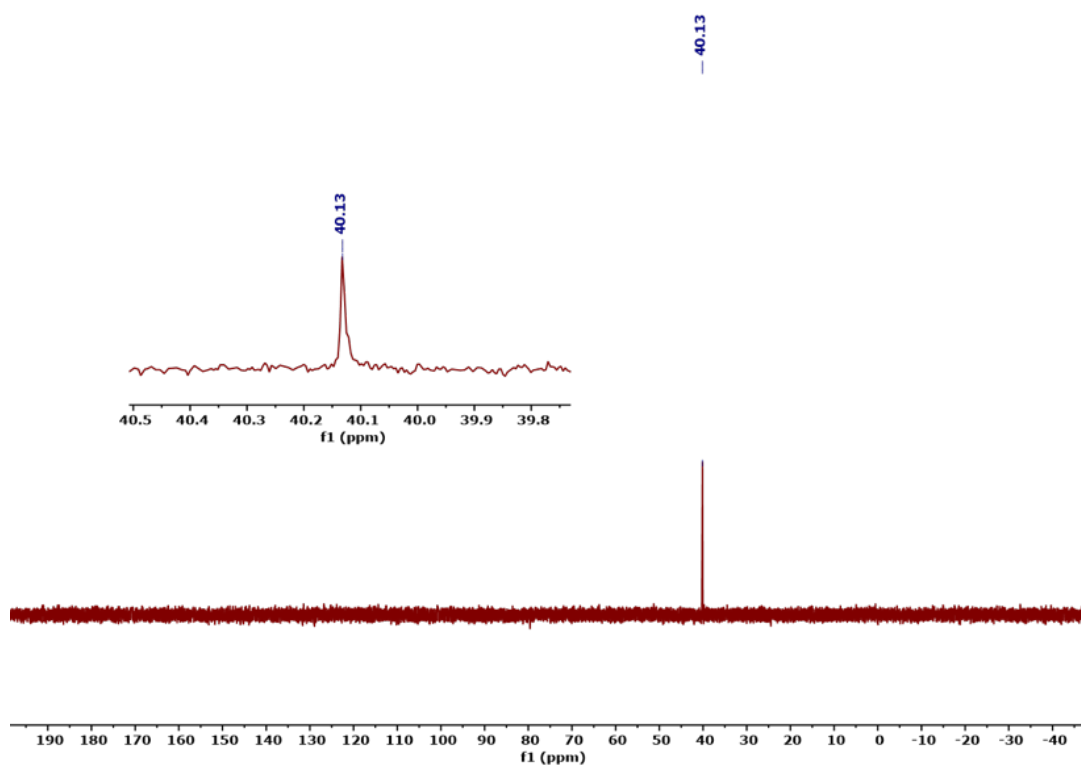

## Complex 7b

$^1\text{H}$  NMR (499.70 MHz,  $\text{CD}_2\text{Cl}_2$ , 298 K)

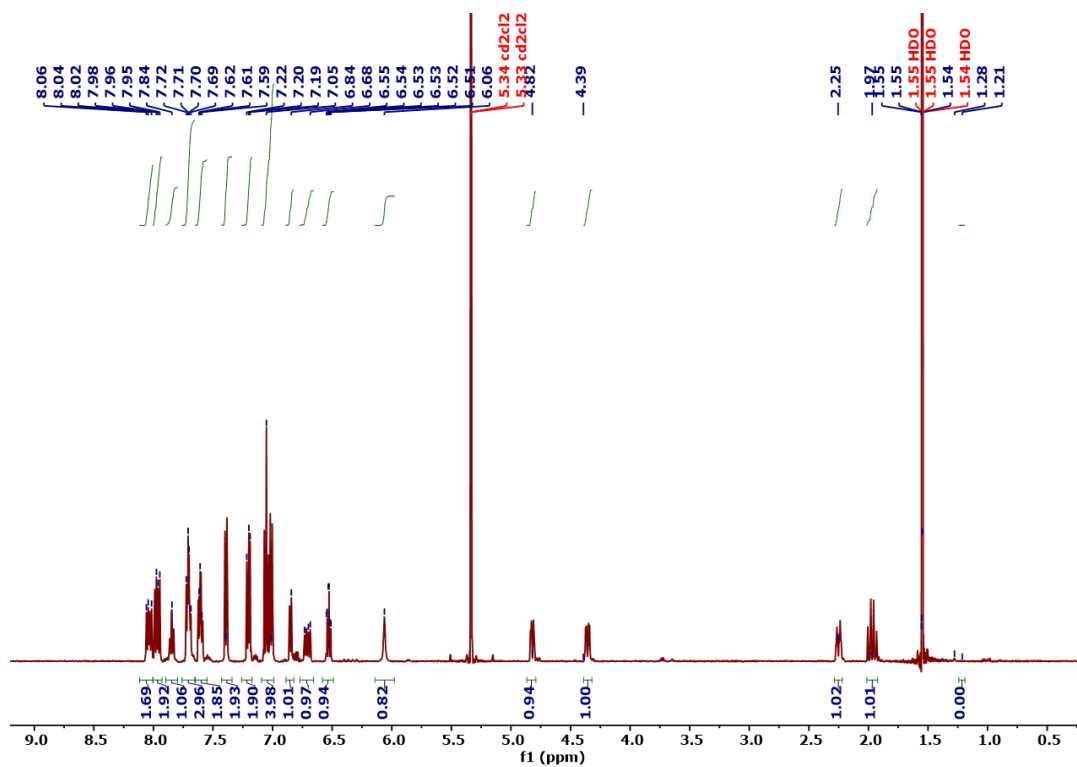

$^{19}\text{F}$  NMR (470.17 MHz,  $\text{CD}_2\text{Cl}_2$ , 298 K)

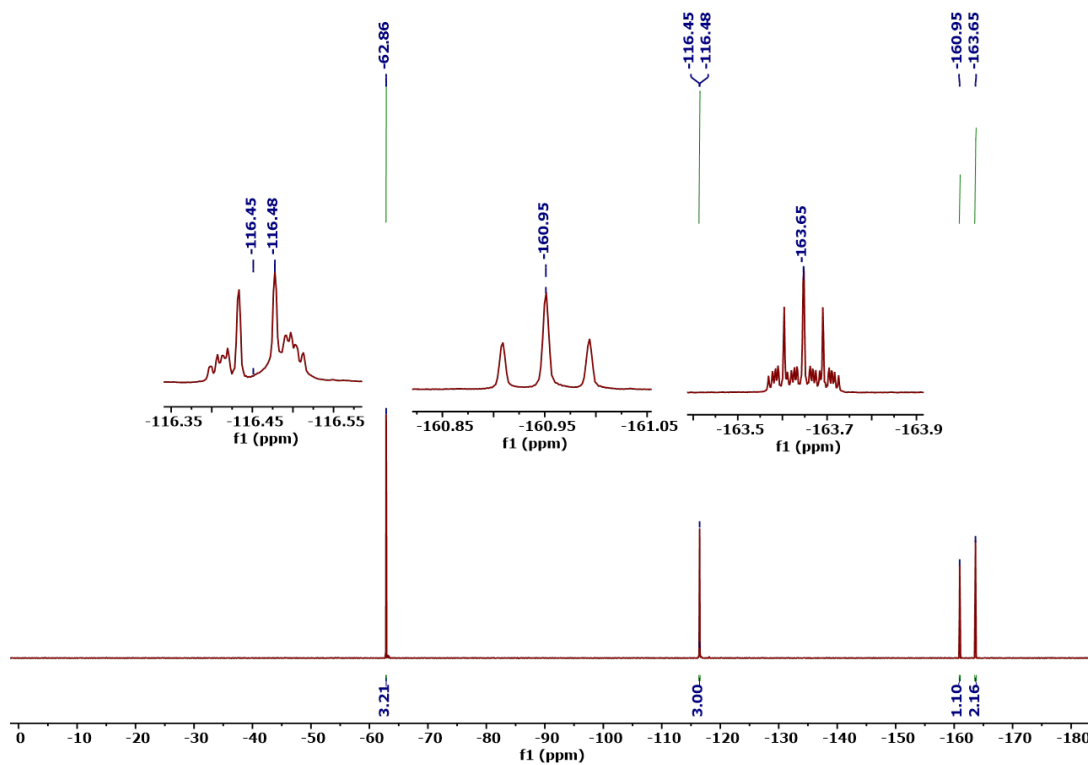

$^{31}\text{P}\{^1\text{H}\}$  NMR (202.31 MHz,  $\text{CD}_2\text{Cl}_2$ , 298 K)

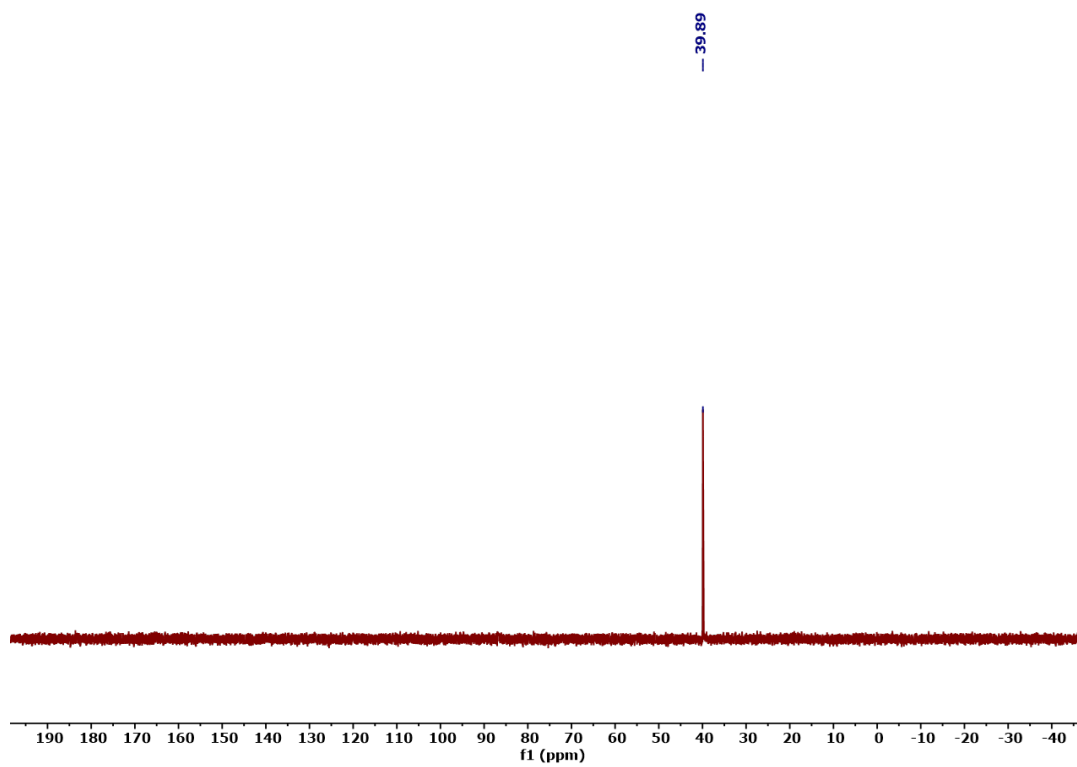

## Complex 8

$^1\text{H}$  NMR (499.70 MHz,  $\text{CD}_2\text{Cl}_2$ , 298 K)

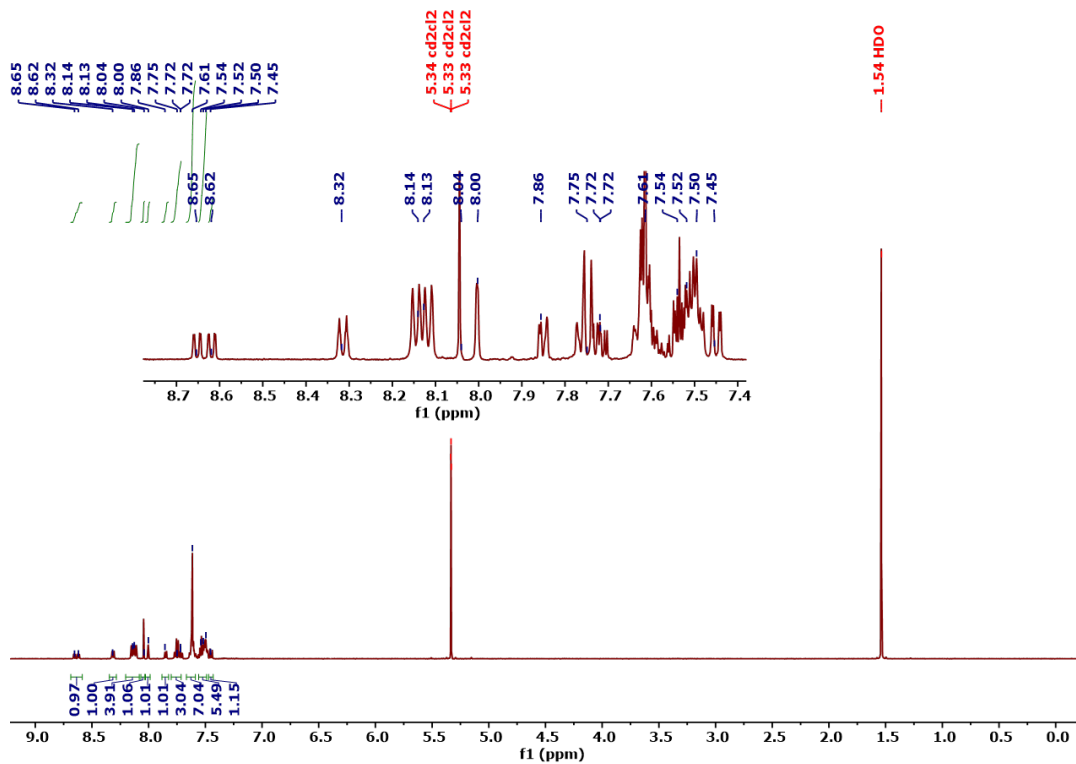

$^{19}\text{F}$  NMR (470.17 MHz,  $\text{CD}_2\text{Cl}_2$ , 298 K)

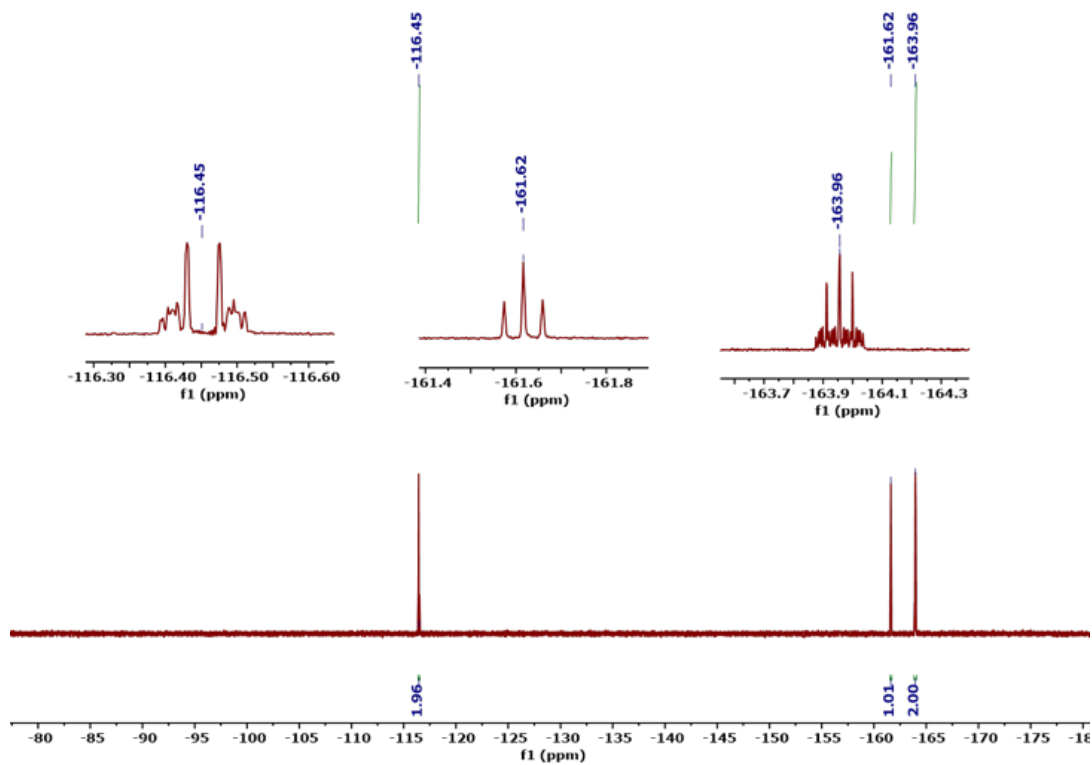

$^{31}\text{P}\{^1\text{H}\}$  NMR (202.31 MHz,  $\text{CD}_2\text{Cl}_2$ , 298 K)

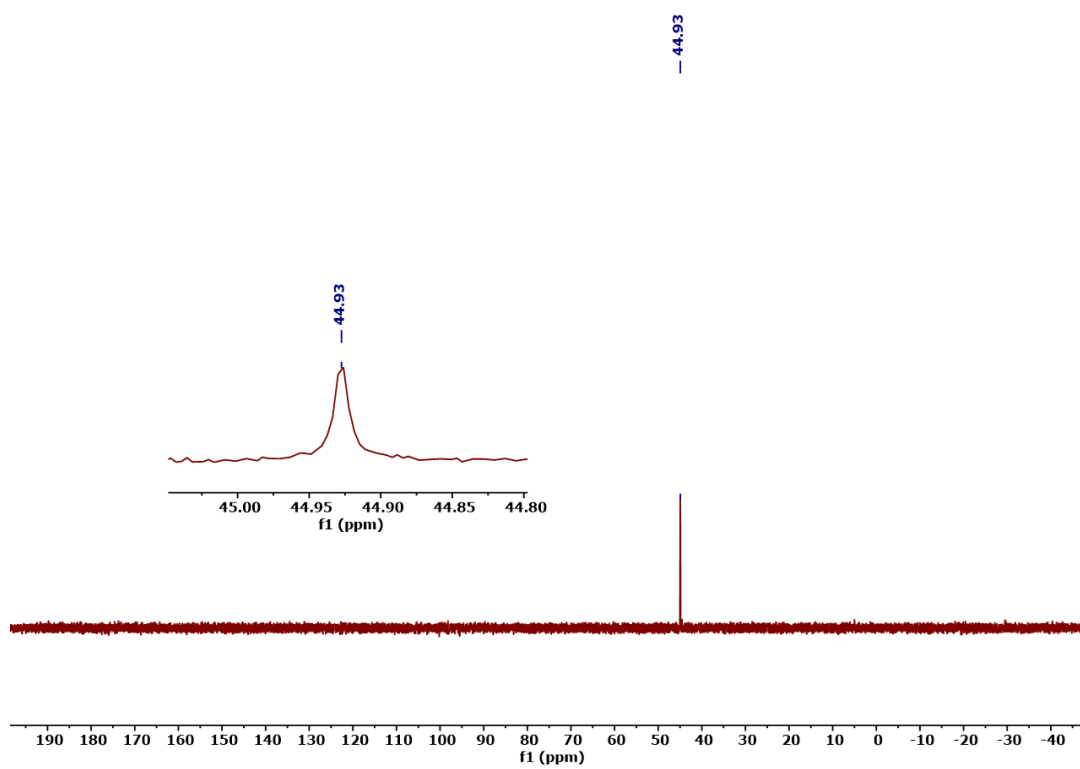

**Table S1.** Crystal data and structure refinements for complexes **5**, **6** and **8**.

|                                            | <b>5</b>                                                      | <b>6</b>                                                      | <b>8</b>                                                      |
|--------------------------------------------|---------------------------------------------------------------|---------------------------------------------------------------|---------------------------------------------------------------|
| Empirical formula                          | C <sub>24</sub> H <sub>15</sub> AuF <sub>5</sub> PS           | C <sub>24</sub> H <sub>16</sub> AuF <sub>5</sub> NPS          | C <sub>43</sub> H <sub>26</sub> AuF <sub>5</sub> NPS          |
| Formula weight                             | 658.36                                                        | 673.37                                                        | 911.64                                                        |
| Temperature/K                              | 293                                                           | 293                                                           | 293.0                                                         |
| Crystal system                             | triclinic                                                     | monoclinic                                                    | triclinic                                                     |
| Space group                                | P-1                                                           | P2 <sub>1</sub> /n                                            | P-1                                                           |
| a/Å                                        | 7.3678(4)                                                     | 12.2818(5)                                                    | 8.9368(3)                                                     |
| b/Å                                        | 9.2749(5)                                                     | 12.6786(5)                                                    | 13.7072(6)                                                    |
| c/Å                                        | 16.2849(8)                                                    | 15.1093(6)                                                    | 15.0808(5)                                                    |
| α/°                                        | 83.944(4)                                                     | 90                                                            | 79.195(3)                                                     |
| β/°                                        | 79.946(4)                                                     | 104.371(4)                                                    | 78.797(3)                                                     |
| γ/°                                        | 89.716(5)                                                     | 90                                                            | 88.661(3)                                                     |
| Volume/Å <sup>3</sup>                      | 1089.53(10)                                                   | 2279.14(16)                                                   | 1779.88(12)                                                   |
| Z                                          | 2                                                             | 4                                                             | 2                                                             |
| ρ <sub>calc</sub> /cm <sup>3</sup>         | 2.007                                                         | 1.962                                                         | 1.701                                                         |
| μ/mm <sup>-1</sup>                         | 6.973                                                         | 6.670                                                         | 4.296                                                         |
| F(000)                                     | 628.0                                                         | 1288.0                                                        | 892.0                                                         |
| Crystal size/mm <sup>3</sup>               | 0.27 × 0.22 × 0.08                                            | 0.41 × 0.11 × 0.09                                            | 0.29 × 0.18 × 0.05                                            |
| Radiation                                  | MoKα (λ = 0.71073)                                            | MoKα (λ = 0.71073)                                            | MoKα (λ = 0.71073)                                            |
| 2θ range for data collection/°             | 6.902 to 59.388                                               | 6.85 to 58.938                                                | 6.796 to 59.488                                               |
| Index ranges                               | -8 ≤ h ≤ 10, -11 ≤ k ≤ 12, -21 ≤ l ≤ 22                       | -16 ≤ h ≤ 15, -16 ≤ k ≤ 13, -18 ≤ l ≤ 13                      | -12 ≤ h ≤ 11, -16 ≤ k ≤ 17, -20 ≤ l ≤ 20                      |
| Reflections collected                      | 8331                                                          | 13272                                                         | 13693                                                         |
| Independent reflections                    | 5059 [R <sub>int</sub> = 0.0365, R <sub>sigma</sub> = 0.0761] | 5479 [R <sub>int</sub> = 0.0366, R <sub>sigma</sub> = 0.0539] | 8294 [R <sub>int</sub> = 0.0289, R <sub>sigma</sub> = 0.0659] |
| Data/restraints/parameters                 | 5059/0/289                                                    | 5479/0/299                                                    | 8294/0/469                                                    |
| Goodness-of-fit on F <sup>2</sup>          | 0.994                                                         | 1.024                                                         | 1.047                                                         |
| Final R indexes [I ≥ 2σ (I)]               | R <sub>1</sub> = 0.0423, wR <sub>2</sub> = 0.0630             | R <sub>1</sub> = 0.0409, wR <sub>2</sub> = 0.0714             | R <sub>1</sub> = 0.0441, wR <sub>2</sub> = 0.0766             |
| Final R indexes [all data]                 | R <sub>1</sub> = 0.0671, wR <sub>2</sub> = 0.0742             | R <sub>1</sub> = 0.0779, wR <sub>2</sub> = 0.0849             | R <sub>1</sub> = 0.0736, wR <sub>2</sub> = 0.0892             |
| Largest diff. peak/hole /e Å <sup>-3</sup> | 0.79/-1.01                                                    | 0.86/-0.97                                                    | 0.98/-0.82                                                    |



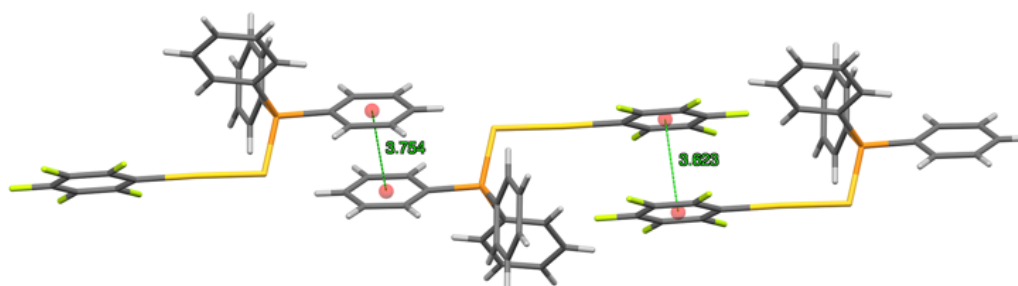

**Figure S3.** Partial view of crystal packing of **5**. Centroids of  $C_6F_5$  rings are shown as red circles and centroid...centroid distance is 3.754 Å . Color code: C, dark gray; P, orange; Au, S, yellow; F, green and H, gray.

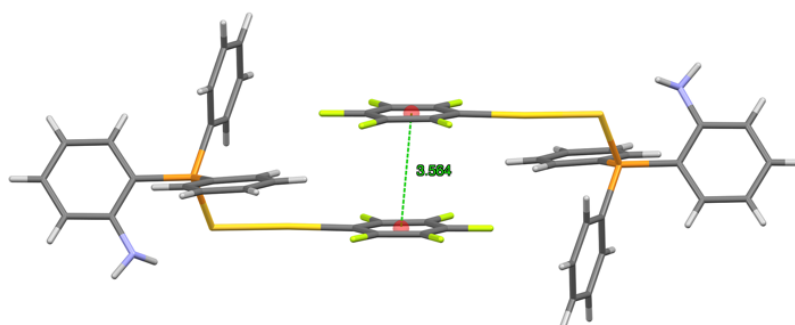

**Figure S4.** Partial view of crystal packing of **6**. Centroids of  $C_6F_5$  rings are shown as red circles and centroid...centroid distance is 3.554 Å . Color code: C, dark gray; P, orange; Au, S, yellow; F, green; N blue and H, gray.

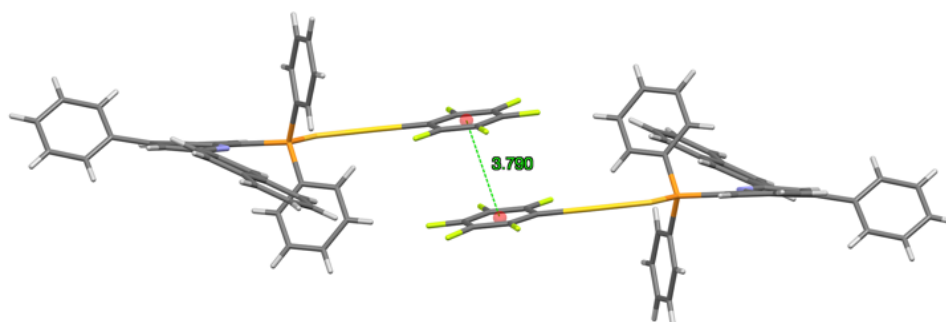

**Figure S5.** Partial view of crystal packing of **8**. Centroids of  $C_6F_5$  rings are shown as red circles and centroid...centroid distance is 3.790 Å . Color code: C, dark gray; P, orange; Au, S, yellow; F, green and H, gray.
